# Supplementary material for: Factor Structure and Measurement Invariance Between Fathers and Mothers and Across Three Time Points After Childbirth: Identification of Core Items of The Japanese Version of The Mother-To-Infant Bonding Scale
Source: Research Square preprint supplement (doi:10.21203/rs.3.rs-1006778/v1), 2021-10-29
Supplement: Supplementary file 1 [file 2a3b0c3bca4cae8bb679c941.doc]

Supplementary Table 2. Measurement and structural invariance of four MIBS-J items between fathers and mothers

| Models |  | χ2 | *df* | χ2/*df* | Δχ2 (*df*) | CFI | ΔCFI | RMSEA | ΔRMSEA | Judgement |
| --- | --- | --- | --- | --- | --- | --- | --- | --- | --- | --- |
| W1 fathers vs. mothers | Configural | 16.179 | 4 | 4.045 | Ref | .983 | Ref | 0.058 | Ref | Accept |
|  | Metric | 21.976 | 7 | 3.139 | 5.797(3) NS | .979 | 0.004 | 0.049 | Δ0.009 | Accept |
|  | Scalar | 48.216 | 11 | 4.383 | 26.24(4) *** | .948 | 0.031 | 0.062 | 0.013 | Reject |
| W2 fathers vs. mothers | Configural | 17.203 | 4 | 4.301 | Ref | .986 | Ref | 0.061 | Ref | Accept |
|  | Metric | 18.906 | 7 | 2.701 | 1.703(3) NS | .988 | +0.002 | 0.044 | Δ0.017 | Accept |
|  | Scalar | 56.213 | 11 | 5.110 | 37.307(4) *** | .953 | 0.035 | 0.068 | 0.024 | Reject |
| W3 fathers vs. mothers | Configural | 8.820 | 4 | 2.205 | Ref | .994 | Ref | 0.037 | Ref | Accept |
|  | Metric | 28.868 | 7 | 4.124 | 20.048(3) *** | .974 | 0.020 | 0.059 | 0.22 | Reject |
|  | Metric (partial invariance) item 1 | 23.324 | 6 | 3.887 | 14.504(2) *** | .980 | 0.014 | 0.057 | 0.020 | Reject |
|  | Metric (partial invariance) item 6 | 28.107 | 6 | 4.685 | 19.287(2) *** | .974 | 0.020 | 0.064 | 0.027 | Reject |
|  | Metric (partial invariance) item 10 | 10.114 | 6 | 1.686 | 1.294(2) NS | .995 | +0.001 | 0.028 | Δ0.009 | Accept |
|  | Scalar | 73.648 | 15 | 6.695 | 63.534(9) *** | .926 | 0.069 | 0.103 | 0.075 | Reject |

MIBS-J = mother-to-infant bonding scale; +inadmissible solution; **p* < .05, ***p* < .01, ****p* < .001; Ref. = reference; CFI = comparative fit index; RMSEA = root mean square error of approximation; W1 = 5 days after childbirth; W2 = 1 month after childbirth; W3 = 4 months after childbirth; n = 350 for fathers and 543 for mothers.
