# Supplementary material for: Factor Structure and Measurement Invariance Between Fathers and Mothers and Across Three Time Points After Childbirth: Identification of Core Items of The Japanese Version of The Mother-To-Infant Bonding Scale
Source: Research Square preprint supplement (doi:10.21203/rs.3.rs-1006778/v1), 2021-10-29
Supplement: Supplementary file 1 [file 6eb8c1cc857cb6a833f255e5.doc]

Supplementary Table 1. Factor loadings of five MIBS-J items on each factor within different models.

| MIBS-J item | |  | Model 1 | Model 2 | |
| --- | --- | --- | --- | --- | --- |
|  | |  | (1-factor) | (2-factor) | |
|  |  |  | I | I | II |
| 1 | I feel loving towards my child | W1 fathers (n = 166)  mothers (n = 282) | **0.68** | **0.70** | -0.06 |
| **0.68** | **0.73** | -0.10 |
|  | W2 | **0.80** | **0.89** | -0.19 |
| **0.83** | **0.88** | -0.04 |
|  | W3 | **0.70** | **0.72** | -0.08 |
| **0.75** | **0.68** | 0.08 |
| 2 | I feel scared or panicky when I have to do something for my child | W1 | 0.15 | -0.03 | **1.00** |
| 0.24 | -0.02 | **1.00** |
|  | W2 | 0.11 | -0.09 | **0.58** |
| 0.24 | -0.15 | **0.55** |
|  | W3 | 0.21 | 0.00 | **1.00** |
| 0.20 | -0.06 | **0.36** |
| 6 | I enjoy doing things with my child | W1 | **0.74** | **0.74** | 0.00 |
| **0.60** | **0.53** | 0.22 |
|  | W2 | **0.60** | **0.55** | 0.11 |
| **0.56** | 0.14 | **0.63** |
|  | W3 | **0.62** | **0.60** | 0.06 |
| **0.55** | 0.04 | **0.80** |
| 8 | I feel protective towards my child | W1 | **0.58** | **0.60** | -0.10 |
| **0.64** | **0.66** | -0.05 |
|  | W2 | **0.74** | **0.75** | -0.09 |
| **0.66** | **0.76** | -0.14 |
|  | W3 | **0.78** | **0.80** | -0.06 |
| **0.65** | **0.79** | -0.14 |
| 10 | I feel close to my child | W1 | **0.69** | **0.66** | 0.17 |
| **0.68** | **0.67** | 0.02 |
|  | W2 | **0.66** | **0.57** | **0.36** |
| **0.69** | **0.50** | 0.26 |
|  | W3 | **0.76** | **0.74** | 0.09 |
| **0.64** | **0.59** | 0.07 |

MIBS-J = mother-to-infant bonding scale; Factor loadings >0.30 are in boldface; *the exploratory factor analysis; upper figure in each cell represents factor loading (or total variance explained) among fathers, whereas the lower figure in each cell represents factor loading (or total variance explained) among mothers. Item scores after log transformation were entered into an exploratory factor analysis. Each score ranges from 1 (not at all) to 4 (very much). No items were reversed. W1 = 5 days after childbirth; W2 = 1 month after childbirth; W3 = 4 months after childbirth; n = 166 for fathers and 282 for mothers.
